# Supplementary material for: Lipid droplets and peroxisomes are co-regulated to drive lifespan extension in response to mono-unsaturated fatty acids
Source: PubMed Central journal article supplement (PMC10185472; doi:10.1038/s41556-023-01136-6), 2023-05-01
Supplement: 41556_2023_1136_MOESM9_ESM.pdf [file 41556_2023_1136_MOESM9_ESM.pdf]

Salinazid

|                 |                      |                      |                                  |
|-----------------|----------------------|----------------------|----------------------------------|
| -               | -                    | +                    | -                                |
| Young/Wild type | Middle age/Wild type | Middle age/Wild type | Middle age/ <i>gpx-1(tm2100)</i> |

Salinazid

|                 |                      |                      |                                  |
|-----------------|----------------------|----------------------|----------------------------------|
| -               | -                    | +                    | -                                |
| Young/Wild type | Middle age/Wild type | Middle age/Wild type | Middle age/ <i>gpx-1(tm2100)</i> |

Salinazid

|                 |                      |                      |                                  |
|-----------------|----------------------|----------------------|----------------------------------|
| -               | -                    | +                    | -                                |
| Young/Wild type | Middle age/Wild type | Middle age/Wild type | Middle age/ <i>gpx-1(tm2100)</i> |

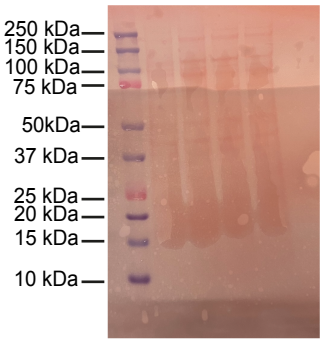

Ponceau

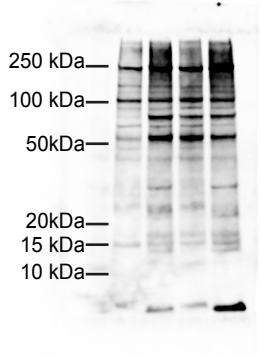

4-HNE

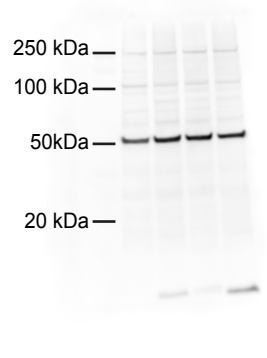

Tubulin
